# Improving estimates of waning immunity rates in stochastic SIRS models with a hierarchical framework

Punya Alahakoon<sup>1,3,4</sup>, James M. McCaw<sup>\*,2</sup>, Peter G. Taylor<sup>1</sup>

<sup>1</sup>School of Mathematics and Statistics, The University of Melbourne, Melbourne, Australia.

<sup>2</sup>Centre for Epidemiology and Biostatistics, Melbourne School of Population and Global Health, The University of Melbourne, Melbourne, Australia.

<sup>3</sup>School of Population Health, University of New South Wales, Sydney, Australia.

<sup>4</sup>Kirby Institute, University of New South Wales, Sydney, Australia.

## Abstract

1 As most disease causing pathogens require transmission from an infectious individual to a  
2 susceptible individual, continued persistence of the pathogen within the population requires  
3 the replenishment of susceptibles through births, immigration, or waning immunity.

4 Consider the introduction of an unknown infectious disease into a fully susceptible population  
5 where it is not known how long immunity is conferred once an individual recovers from  
6 infection. If, initially, the prevalence of disease increases (that is, the infection takes off),  
7 the number of infectives will usually decrease to a low level after the first major outbreak.  
8 During this post-outbreak period, the disease dynamics may be influenced by stochastic  
9 effects and there is a non-zero probability that the epidemic will die out. Die out in this  
10 period following the first major outbreak is known as an epidemic fade-out. If the disease  
11 does not die out, the susceptible population may be replenished by the waning of immunity,  
12 and a second wave may start.

13 In this study, we investigate if the rate of waning immunity (and other epidemiological  
14 parameters) can be reliably estimated from multiple outbreak data, in which some outbreaks  
15 display epidemic fade-out and others do not. We generated synthetic outbreak data from  
16 independent simulations of stochastic *SIRS* models in multiple communities. Some outbreaks  
17 faded-out and some did not. We conducted Bayesian parameter estimation under two  
18 alternative approaches: independently on each outbreak and under a hierarchical framework.  
19 When conducting independent estimation, the waning immunity rate was poorly estimated  
20 and biased towards zero when an epidemic fade-out was observed. However, under a  
21 hierarchical approach, we obtained more accurate and precise posterior estimates for the  
22 rate of waning immunity and other epidemiological parameters. The greatest improvement  
23 in estimates was obtained for those communities in which epidemic fade-out was observed.

24 Our findings demonstrate the feasibility and value of adopting a Bayesian hierarchical  
25 approach for parameter inference for stochastic epidemic models.

## 26 1 Introduction

27 Infectious diseases do not always provide life-long or long-term protective immunity after infection (Heffernan  
28 & Keeling, 2009; Mathews, McCaw, McVernon, McBryde, & McCaw, 2007). Some common examples are  
29 pertussis (Mooi, Van Der Maas, & De Melker, 2014), seasonal influenza (Camacho & Cazelles, 2013), and  
30 the A/H3N2 epidemic that occurred on the remote island of Tristan da Cunha in 1971 (Camacho et al.,  
31 2011). Furthermore, for emerging infectious diseases, sufficient biological evidence to hypothesise that either  
32 re-infection or life-long immunity is possible is often limited, as was evident during the early stages of the  
33 recent COVID-19 pandemic (Lavine, Bjornstad, & Antia, 2021; Telenti et al., 2021).

34 Mathematical epidemic models rely on compartmentalisation of the population into different states that  
35 are related to the infectious disease of interest (Camacho & Cazelles, 2013; Heffernan & Keeling, 2009;  
36 Kermack & McKendrick, 1927). Deterministic epidemic models that allow for replenishment of susceptibles  
37 via re-infection, births or immigration typically display damped oscillatory behaviour (Keeling & Rohani,  
38 2011). The simplest model for such a situation is the one that allows for re-infection, the *SIRS* model. In  
39 this model, recovered individuals have immunity that wanes resulting in them becoming susceptible again.

---

\*jamesm@unimelb.edu.au

40 In contrast to a deterministic model, the number of infectives in a stochastic *SIRS* model can drop to  
41 zero. This occurs due to random effects at low disease prevalence levels. Once an outbreak avoids the initial  
42 fade-out (disease extinction during the start of the epidemic), there exists a trough following the first major  
43 outbreak (Lloyd, 2004). There is a non-zero probability that disease extinction will occur during this trough  
44 (Lloyd-Smith et al., 2005). This is known as an epidemic fade-out (Alahakoon, McCaw, & Taylor, 2022;  
45 Ballard, Bean, & Ross, 2016; Bartlett, 1960; Camacho et al., 2011; Camacho & Cazelles, 2013; Lloyd-Smith  
46 et al., 2005; Meerson & Sasorov, 2009; van Herwaarden, 1997). If epidemic fade-out does not take place, the  
47 susceptible fraction will increase due to the waning of immunity, and once the effective reproduction number  
48 is greater than one, a second wave may be started. The likelihood of the occurrence of epidemic fade-out or  
49 non-fade-out depends on the model parameters of which the outbreak is modeled Anderson and May (1992).

50 Here, we consider a hypothetical pathogen where there is insufficient evidence to assume that recovered  
51 individuals remain immune from infection forever. We consider outbreaks of this disease observed in small  
52 closed communities (sub-populations) during short periods of time where demographic factors may be  
53 ignored. We assume outbreaks in these sub-populations take place independently, that is, the dynamics in  
54 one sub-population do not influence those in another. This assumption would be appropriate, for example,  
55 if the sub-populations were on multiple (geographically and/or temporally separated) islands or aboard  
56 multiple ships. Due to stochastic effects and variability in the characteristics of the sub-populations, we might  
57 observe epidemic fade-out in some sub-populations and not in others. In our previous work (Alahakoon et al.,  
58 2022), we introduced a novel Approximate Bayesian Computation algorithm to estimate the parameters of  
59 a stochastic epidemic model within a hierarchical framework. We tested the epidemiological applicability  
60 of this estimation framework only in the case where there is a single unknown parameter in the model. In  
61 this study, we extend our previous estimation framework to the more realistic situation in which there are  
62 multiple unknown parameters and evaluate the performance of the algorithm through a study in which the  
63 transmission rate, infectious duration and rate of waning immunity are all estimated.

64 In particular, conditional on an epidemic taking off, we attempt to recover the waning immunity rate when  
65 epidemic fade-outs are observed. We conduct a simulation-based experiment where multiple outbreaks of  
66 synthetic data are generated from a stochastic *SIRS* model. Some outbreaks display fade-outs while others do  
67 not. We estimate model parameters by considering each outbreak independently as well as under a Bayesian  
68 hierarchical framework. We further consider two assumptions for the prior distributions under the Bayesian  
69 framework: one in which zero appears in the support of the prior distribution for the waning immunity rate  
70 and one where it does not. We demonstrate that when the estimation is conducted independently, the waning  
71 immunity rate is often poorly estimated, particularly when an epidemic fade-out is observed. We then show  
72 that the estimates of the waning immunity rate are improved when the estimation is carried out under a  
73 hierarchical framework. Additionally, we show that, given existing knowledge from a number of previous  
74 outbreaks, the waning immunity rate for a new and in-progress outbreak may be estimated accurately under  
75 a hierarchical framework.

## 76 2 Background

### 77 2.1 The Markovian *SIRS* model in a closed sub-population

78 In a well-mixed sub-population of size  $N$ , we will denote the number of susceptibles, infectious individuals  
79 and recovered individuals by  $S(t)$ ,  $I(t)$ , and  $R(t)$  respectively at time  $t$ . An *SIRS* model is parameterised by  
80  $\beta$ , the transmission rate,  $\gamma$ , the rate of recovery, and  $\mu$ , the waning immunity rate. The stochastic *SIRS*  
81 system can be formulated as a continuous-time Markov chain with bi-variate states  $(S(t), I(t))$ . The model  
82 structure is illustrated in Figure 1 and the transition rates are presented in Table 1. When  $\mu = 0$ , the  
83 dynamics of this model are identical to those of the *SIR* model.

84 In the model as we have formulated it below, in which mixing is assumed to be frequency-dependent, the  
85 constant  $\beta$  incorporates the rate at which two given individuals meet and, in the case where one is infectious  
86 and one is susceptible, transmission occurs. Alternative formulations incorporate the  $N - 1$  into the constant  
87  $\beta$  and reflect an assumption of density-dependent mixing. Since we are considering our population size to be  
88 fixed, the two formulations are equivalent in our context (Begon et al., 2002; McCallum, Barlow, & Hone,  
89 2001).

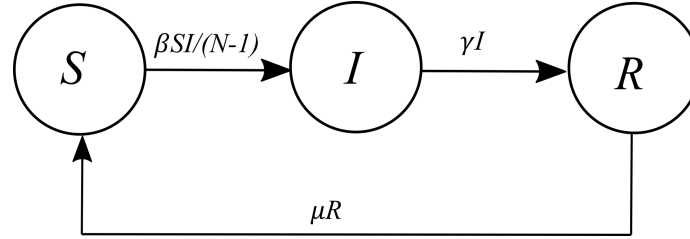

Figure 1: *SIRS* model structure.

Table 1: Transition rates of an *SIRS* model

| Event            | Transition                          | Rates                    |
|------------------|-------------------------------------|--------------------------|
| Infection        | $(s, i) \rightarrow (s - 1, i + 1)$ | $\beta si / (N - 1)$     |
| Recovery         | $(s, i) \rightarrow (s, i - 1)$     | $\gamma i$               |
| Loss of immunity | $(s, i) \rightarrow (s + 1, i)$     | $\mu r, (r = N - s - i)$ |

## 90 2.2 A Bayesian hierarchical modelling framework

91 In this study, we consider the estimation of parameters under a hierarchical modeling approach. We  
 92 assume that we are studying outbreaks in  $K$  sub-populations and each outbreak can be modeled using a  
 93 continuous-time Markov chain with transition rates defined in Table 1. For  $k = 1, \dots, K$ , we denote the  
 94 parameter set  $(\beta_k, \gamma_k, \mu_k)$  governing the evolution of the  $k$ th sub-population by  $\theta_k$ . Under a hierarchical  
 95 framework, we assume that the  $\theta_k$  are drawn from a common distribution (Gelman et al., 2013). Applications  
 96 of hierarchical modeling frameworks to epidemiology can be found in studies such as Alahakoon, Taylor, and  
 97 McCaw (2023); Cao et al. (2019); Coly, Garrido, Abrial, and Yao (2021); Lawson and Song (2010); Mathews,  
 98 McBryde, McVernon, Pallaghy, and McCaw (2010).

99 We construct our hierarchical framework with three levels similar to that of Alahakoon et al. (2022).  
 100 Level I represents the observed prevalence data  $\mathbf{y}_k = (I_k(1), I_k(2), \dots, I_k(T_k))$  at  $T_k$  discrete time points for  
 101 sub-populations  $k = 1, 2, \dots, K$ . Level II represents the structural relationship between the sub-population  
 102 specific parameters  $\theta_k$  and the hyper-parameters,  $\Psi$ . The  $\theta_k$  are independent random variables with common  
 103 densities  $p(\theta|\Psi)$ , which we take to be normal with mean and standard deviation given by  $\Psi$ . Finally, Level  
 104 III represents the prior distributions for the hyper-parameters, which are generally known as hyper-prior  
 105 distributions,  $p(\Psi)$  (Gelman et al., 2013).

The joint posterior density for a population consisting of  $K$  sub-populations is,

$$\begin{aligned}
 p(\theta_1, \theta_2, \dots, \theta_K, \Psi | \mathbf{y}) &= \frac{p(\mathbf{y} | \theta_1, \theta_2, \dots, \theta_K, \Psi) p(\theta_1, \theta_2, \dots, \theta_K, \Psi)}{p(\mathbf{y})} = \frac{\left[ \prod_{k=1}^K p(\mathbf{y}_k | \theta_k) p(\theta_k | \Psi) \right] p(\Psi)}{p(\mathbf{y})} \\
 &\propto \left[ \prod_{k=1}^K p(\mathbf{y}_k | \theta_k) p(\theta_k | \Psi) \right] p(\Psi). \quad (1)
 \end{aligned}$$

106 The prior distribution for the model parameters is a multivariate normal distribution with means  $\Psi_\beta, \Psi_\gamma,$   
 107 and  $\Psi_\mu$ , standard deviations  $\sigma_\beta, \sigma_\gamma,$  and  $\sigma_\mu$ , and correlations set to zero.

## 108 3 Materials and Methods

### 109 3.1 Synthetic data generation

110 Using the stochastic SIRS model structure that was introduced in Section 2, we constructed synthetic data  
111 for 15 sub-populations each consisting of 1000 individuals. We fixed the initial conditions of each outbreak to  
112 include one infectious person in each sub-population at the start of the outbreak. We independently generated  
113 transmission, recovery, and waning immunity rates from three truncated normal distributions. We randomly  
114 generated the transmission rates,  $\beta_k$ , for the sub-populations from a normal distribution with a mean of 2.5  
115 and standard deviation of 0.25, truncated on the interval (1, 10). We generated the recovery rates,  $\gamma_k$ , from  
116 a normal distribution with a mean of 1 and a standard deviation of 0.05, truncated on the interval (0, 4).  
117 We generated the waning immunity rates,  $\mu_k$ , from a normal distribution with a mean of 0.06 and standard  
118 deviation of 0.01, truncated on the interval (0.01, 1). We used the methods of Ballard et al. (2016) to choose  
119 values for the hyper-parameters so that some of the sub-populations would display a fade-out and others  
120 would not.

121 See Table 2 for summary statistics of the actual values of the parameters that were generated for each  
122 of the sub-populations. Using these parameters for the *SIRS* model, we generated sample paths from the  
123 Doob-Gillespie (Doob, 1945; Gillespie, 1977) algorithm for 35 days and retained the prevalence of infections  
124 each day. If a sample path produced an initial fade-out, we discarded that sample path and repeatedly  
125 generated sample paths until an initial outbreak was observed. The criteria we used to identify an outbreak  
126 were similar to Alahakoon et al. (2022). See Supplementary Material for further details. Figure 2 shows the  
127 time-series data of the 15 sub-populations. Sub-populations 4, 8, 10, 11, 12, 14, and 15 displayed an epidemic  
128 fade-out and other sub-populations displayed multiple waves.

Table 2: Summary statistics of the parameters of the 15 outbreaks

| Parameter | Mean   | Standard deviation |
|-----------|--------|--------------------|
| $\beta$   | 2.5235 | 0.3476             |
| $\gamma$  | 1.0198 | 0.0498             |
| $\mu$     | 0.0606 | 0.0073             |

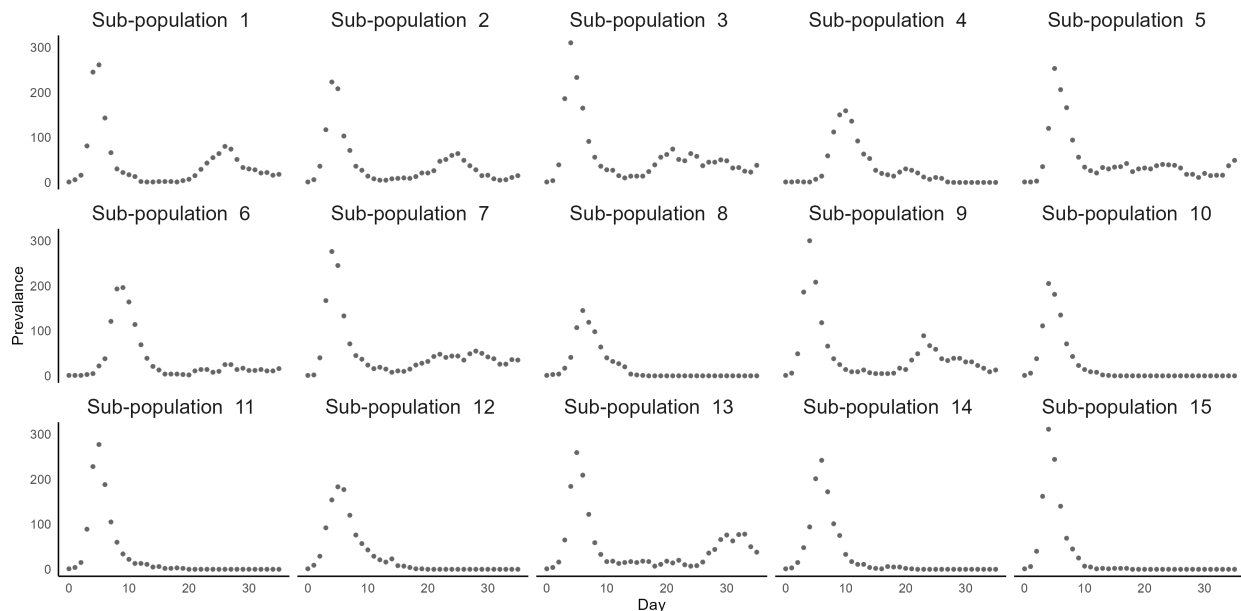

Figure 2: Synthetic data for fifteen sub-populations over 35 days.

### 129 3.2 Estimation framework

130 We implemented two frameworks to estimate the model parameters related to the transmission, recovery,  
 131 and waning immunity rates: 1) estimation by considering each outbreak independently. 2) estimation by  
 132 considering a hierarchical framework. Under each estimation framework, we made two alternative assumptions  
 133 for prior distributions within the Bayesian framework.

134 Under the first assumption, zero is included in the support of the prior distribution for the waning immunity  
 135 rate  $\mu$  while, under the second assumption, the prior constrains  $\mu$  to be greater than 0.01. The latter choice  
 136 reflects an *a priori* assumption that immunity following infection wanes, while the first choice admits the  
 137 possibility of life-long immunity following infection. Tables 3 and 4 illustrate our choice of priors for the  
 138 model parameters under both assumptions.

Table 3: Prior distributions for parameters when the outbreaks are considered independently

| Parameter | Assumption 1        | Assumption 2                                          |
|-----------|---------------------|-------------------------------------------------------|
| $\beta$   | Uniform (0.001,10)  | Uniform (0.001,10)                                    |
| $\gamma$  | Uniform (0.00001,3) | Uniform(0.00001,3)                                    |
| $\mu$     | Uniform (0,0.2)     | Truncated Normal (0.03, 0.1 <sup>2</sup> , 0.01, 0.2) |

Table 4: Prior distributions for hyper-parameters under the hierarchical framework

| Hyper parameter | Assumption 1         | Assumption 2         |
|-----------------|----------------------|----------------------|
| $\Psi_\beta$    | Uniform (0.001, 10)  | Uniform (0.001, 10)  |
| $\sigma_\beta$  | Uniform (0, 2.5)     | Uniform (0, 2.5)     |
| $\Psi_\gamma$   | Uniform (0.00001, 3) | Uniform (0.00001, 3) |
| $\sigma_\gamma$ | Uniform (0, 1)       | Uniform (0, 1)       |
| $\Psi_\mu$      | Uniform (0, 0.2)     | Uniform (0.01, 0.2)  |
| $\sigma_\mu$    | Uniform (0, 0.15)    | Uniform (0, 0.15)    |

139 We conducted parameter estimation under both assumptions for the prior when outbreaks were considered  
 140 independently with the ABC-SMC algorithm of Toni, Welch, Strelkova, Ipsen, and Stumpf (2009). See  
 141 Supplementary Material S1.1 for the details of our calibration of the algorithm. We also used the two-step  
 142 algorithm of Alahakoon et al. (2022) to estimate the parameters under a stochastic hierarchical framework.  
 143 See Supplementary Material S2.1 and S2.2 in relation to the calibration and diagnostics of this step. When  
 144 estimating the hyper-parameters of the conditional prior distribution, the estimated correlations of the  
 145 multivariate distribution were not substantial. Therefore, we used independent conditional prior distributions.  
 146 See Supplementary Material S2 for further explanation.

## 147 4 Results

148 Figure 3 shows the marginal posterior distributions for the sub-population-specific waning immunity rates  
 149 when parameter estimation was carried out independently for each outbreak. Irrespective of the assumed  
 150 prior, the posterior distributions of the sub-populations that did not fade out had similar shapes. For the  
 151 sub-populations that did fade out, the posterior distributions were strongly skewed and truncated at the  
 152 lower bound (at or close to zero) of the prior distribution. This latter result for sub-populations displaying  
 153 fade-out was expected: there is little if any information in the time-series for these sub-populations to inform  
 154 the estimate for the rate of waning immunity,  $\mu$ , and a value equal to or close to zero, yielding *SIR*-like  
 155 dynamics, can provide a sufficient explanation for the observed data, despite the fact that the data were  
 156 generated from an *SIRS* model with a waning immunity rate above zero. See Supplementary Material S1.2  
 157 for a comparison of posterior median and Highest Posterior Density (HPD) intervals (Chen, Shao, & Ibrahim,  
 158 2012) computed from *HDInterval* package in *R* (Meredith & Kruschke, 2020) and for visual diagnostics of  
 159 other parameters.

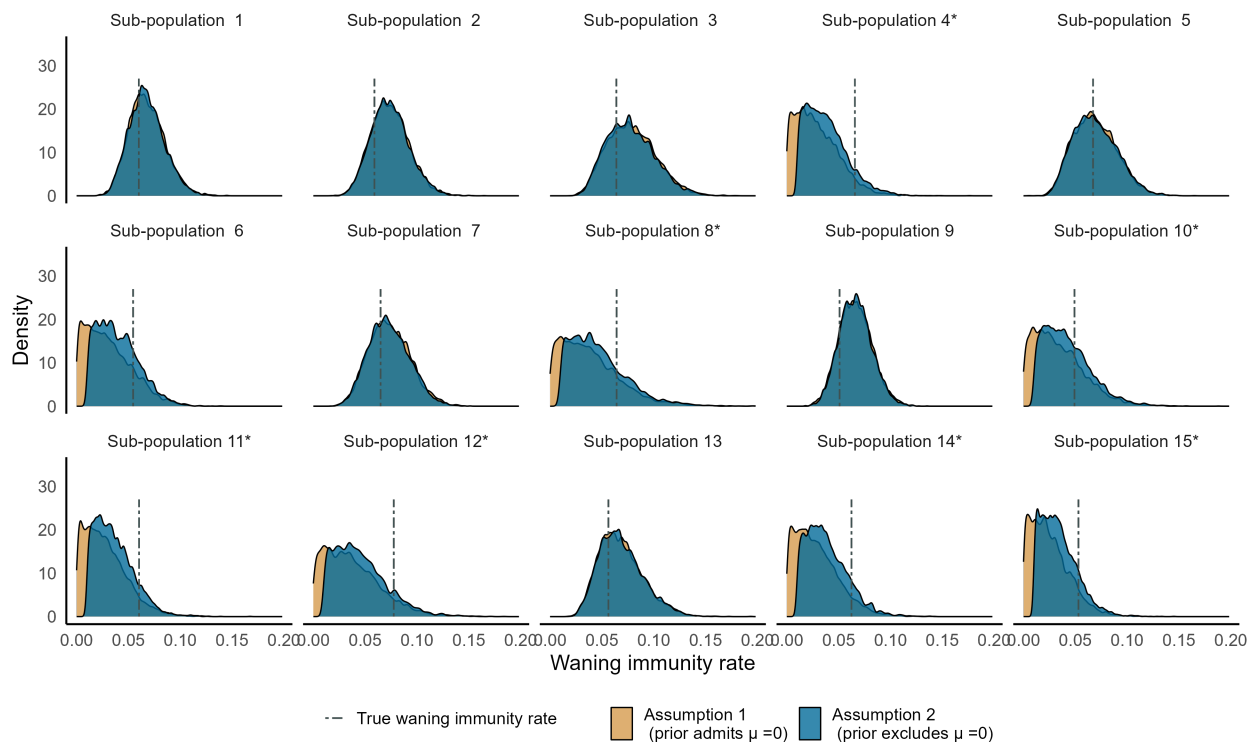

Figure 3: Independent estimation: Posterior distributions for the rate of waning immunity,  $\mu$ , for the sub-populations under two assumptions for the prior. Asterisks represent sub-populations that experienced epidemic fade-out.

160 As we did not observe a substantial difference between the marginal posterior distributions under the  
 161 different assumptions for the prior, hereafter we focus on the second assumption in which the prior for the  
 162 waning immunity rate excludes zero (see Supplementary Material S2.5 for results under the alternative  
 163 choice of prior). We compared estimates for model parameters under independent and hierarchical inference  
 164 frameworks. Figure 4 illustrates the marginal posterior distributions for the rate of waning immunity,  $\mu$  (plot  
 165 (A)), and transmission,  $\beta$  (plot (B)). Particularly for sub-populations that displayed epidemic fade-outs, there  
 166 is a striking difference between the posterior distributions for the rate of waning immunity obtained under  
 167 the two frameworks. The shapes of these distributions changed from highly positively skewed and strongly  
 168 biased towards zero (independent analysis) to slightly negatively skewed and with minimal bias (hierarchical  
 169 analysis).

170 The right panel of Figure 4 illustrates the extent of improvement of parameter estimates under a hierarchical  
 171 analysis in comparison to an independent analysis. For this, we used the Region of Practical Equivalence  
 172 (ROPE) criterion (J. Kruschke, 2014; J. K. Kruschke, 2013, 2018) and the posterior modes of both  $\mu$  and  $\beta$ .  
 173 We used the ROPE criterion (see Supplementary Material S2.6) to identify the percentage of the 95% Highest  
 174 Posterior Density (HPD) intervals of  $\mu$  and  $\beta$  that were included inside the ROPE. For the waning immunity  
 175 rates of the sub-populations that displayed epidemic fade-outs (plot (C)), the median increase was 38%. The  
 176 corresponding increase for those sub-populations that did not display fade-out (plot (D)) was 20.5%. The  
 177 median of the posterior modes for  $\mu$  increased by 0.034 (plot (E)) compared to the independent analysis for  
 178 sub-populations that observed fade-outs. However, for those that did not display fade-out, the variability of  
 179 posterior modes diminished (plot (F)). Overall, under a hierarchical analysis, estimates for the rate of waning  
 180 immunity,  $\mu$ , improved; and the improvement was larger for sub-populations that display epidemic fade-out.

181 For the ROPE percentages for  $\beta$ , the results were similar to those for  $\mu$ . The median increase was 22%  
 182 (plot (G)) and 15% (plot (H)) for sub-populations that did and did not experience fade-out respectively. The  
 183 variability of the posterior modes of sub-populations that did and did not experience fade-out diminished  
 184 (plots (I) and (J)) and we did not observe a shift between the medians of the posterior modes. For the

185 recovery rates,  $\gamma$ , we made similar observations as for the transmission rates. See Supplementary Material  
 186 S2.6.

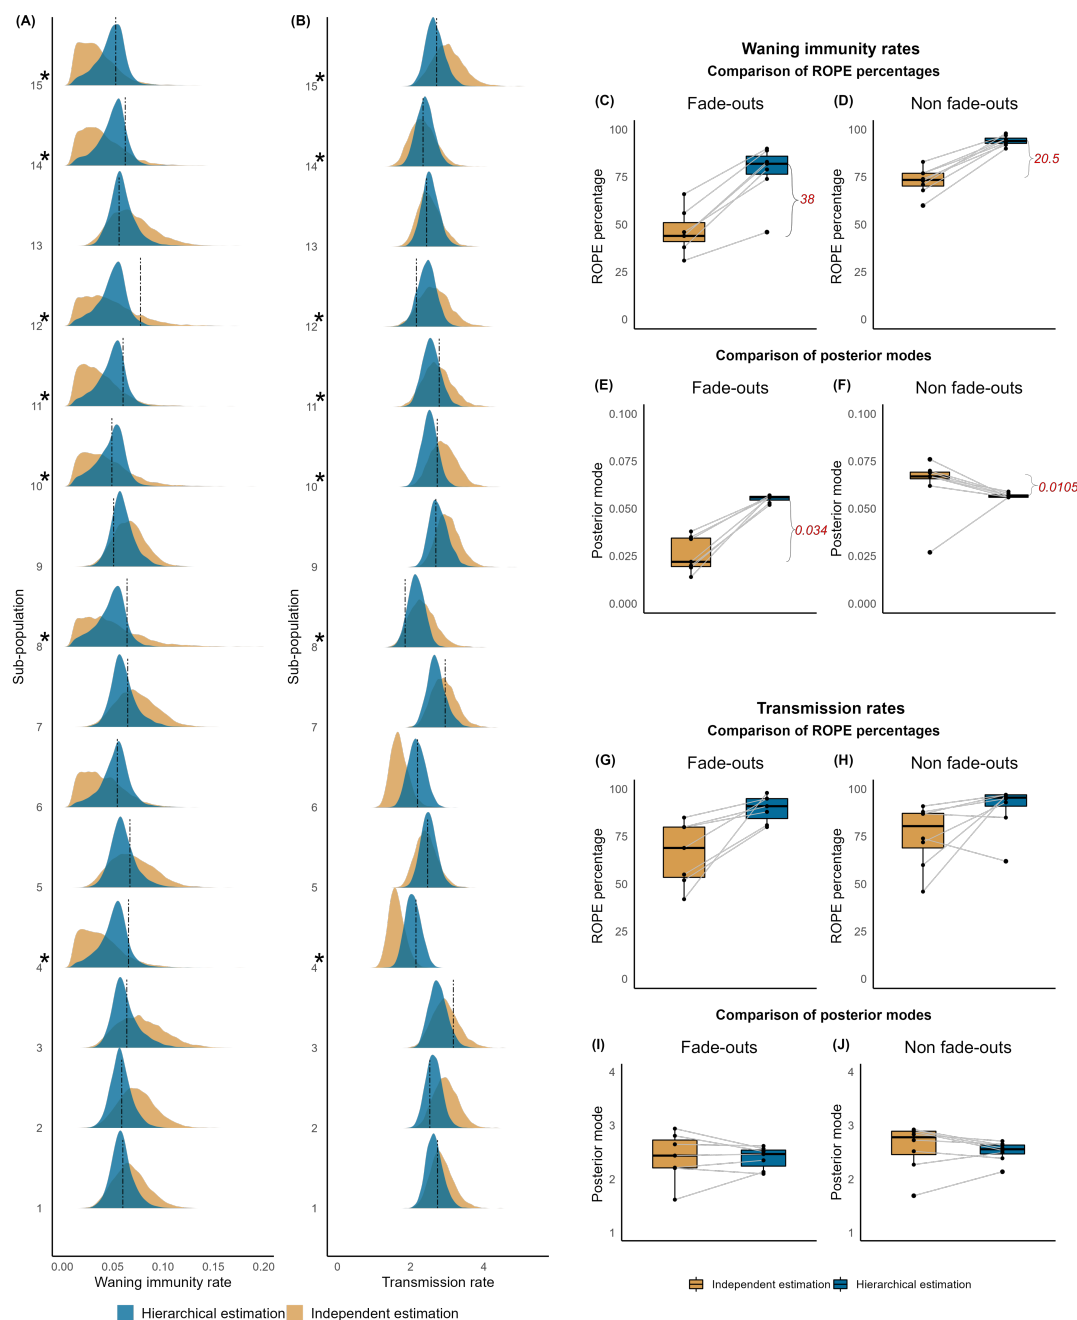

Figure 4: Hierarchical vs. independent estimation (assuming a prior that excludes  $\mu = 0$ ):

**Left panel :** Marginal posterior distributions for waning immunity (**plot (A)**) and transmission rates (**plot (B)**). Asterisks represent sub-populations that experienced epidemic fade-out.

**Top right panel :** Paired comparison of ROPE percentages (**plot (C)**) and posterior modes (**plot (D)**) with independent and hierarchical estimation frameworks for the waning immunity rate when fade-outs and non fade-outs are observed.

**Bottom right panel :** Paired comparison of ROPE percentages (**plot (E)**) and posterior modes (**plot (F)**) with independent and hierarchical estimation frameworks for transmission rate when fade-outs and non fade-outs are observed.

187 Overall, in comparison to an independent analysis, a hierarchical framework dramatically improved the  
 188 estimated posterior densities. Supplementary Material S2.5 provides full details for the analyses, including all  
 189 marginal posterior densities under both choices for the prior on the rate of waning immunity.

190 Figure 5 shows the posterior distributions of the hyper-parameters under the hierarchical analysis and  
 191 with a prior that excludes  $\mu = 0$  (assumption 2). Supplementary Material S2.7 presents estimates under  
 192 the alternative assumption for the prior. Table 5 shows the posterior medians and HPD intervals for the  
 193 hyper-parameters under both assumptions for the prior. The marginal posterior densities of the hyper-  
 194 parameters for transmission rate and recovery rate were well estimated, with the highest posterior density for  
 195 the hyper-mean lying very close to the sample-mean for the sub-population parameters. Estimates for the  
 196 hyper-variances for transmission and recovery rates were also accurate and precise. For the rate of waning  
 197 immunity, both the hyper-mean and hyper-standard deviation were similarly well estimated, with a noticeably  
 198 improved estimate under the prior that excludes  $\mu = 0$  (assumption 2).

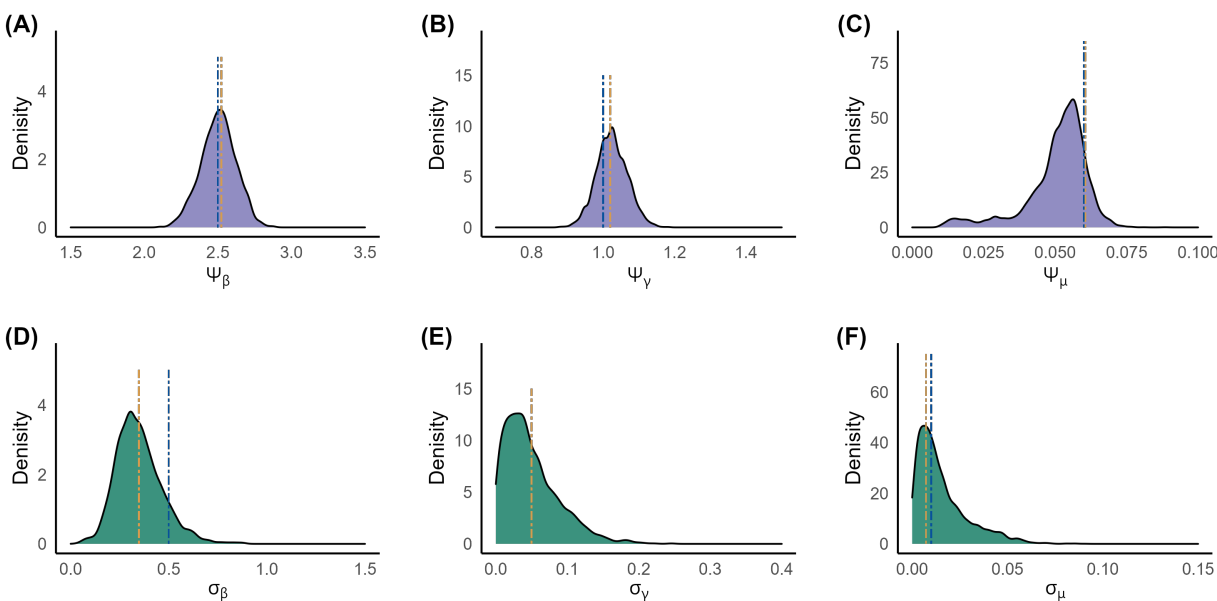

Figure 5: Marginal posterior distributions for the hyper-parameters for  $\beta$  (A),  $\gamma$  (B) and  $\mu$  (C) under the prior that excludes  $\mu = 0$ . **Blue dashed line** : Parameter value. **Orange dashed line** : Mean of the sub-population specific parameters.

Table 5: Summary statistics for the posterior distributions of the hyper-parameters

| Hyper parameter | Assumption 1<br>(prior admits $\mu = 0$ ) |                  | Assumption 2<br>(prior excludes $\mu = 0$ ) |                   |
|-----------------|-------------------------------------------|------------------|---------------------------------------------|-------------------|
|                 | Posterior median                          | HPD interval     | Posterior median                            | HPD interval      |
| $\Psi_\beta$    | 2.5144                                    | (2.2409, 2.7656) | 2.5573                                      | (2.2777, 2.7360)  |
| $\sigma_\beta$  | 0.3956                                    | (0.1333, 0.5983) | 0.3888                                      | (0.1483, 0.6043)  |
| $\Psi_\gamma$   | 1.0198                                    | (0.9280, 1.0957) | 1.0302                                      | (0.9412, 1.1088)  |
| $\sigma_\gamma$ | 0.0539                                    | (0.0003, 0.1245) | 0.0506                                      | (0.0007, 0.1240)  |
| $\Psi_\mu$      | 0.0493                                    | (0.0085, 0.0662) | 0.0524                                      | (0.0249, 0.07020) |
| $\sigma_\mu$    | 0.0143                                    | (0.0002, 0.0509) | 0.0095                                      | (0.0000, 0.0442)  |



#### 199 4.1 Performance of the estimation framework under different parameter regimes

200 To evaluate the robustness of the inference framework, we generated three additional datasets of 15  
 201 sub-populations from different regions of parameter space. Given the epidemiological importance of the basic  
 202 reproduction number,  $R_0$ , we chose values for  $R_0$  at the hyperparametric level of 1.5, 4, and 8 to evaluate the  
 203 method. Furthermore, we chose values for the hyper-parameters  $\psi_\beta$ ,  $\psi_\gamma$ , and  $\psi_\mu$  such that the probability of  
 204 epidemic fade-out was approximately 0.5. Each of the three new datasets consisted of 15 outbreaks. Table 6  
 205 summarises the results from application of an independent and hierarchical inference approach, including  
 206 those for the primary dataset in which  $R_0 = 2.5$ . Full details of these additional analyses can be found in  
 207 the Supplementary Material. Across all four simulation studies, the hierarchical analysis provided improved  
 208 estimates for parameters at both the population (hyper-parameter) and sub-population (parameter) levels.  
 209 In particular, estimates for the rate of waning immunity for those sub-populations in which fade-out was  
 210 observed were notably improved, with the bias (towards an estimate of no waning) either greatly reduced or  
 211 removed entirely.

Table 6: Performance of the hierarchical estimation method in comparison to independent estimation for four alternative epidemiological scenarios (governed by  $R_0$ ), using a prior that allows for  $\mu = 0$  (assumption 1)

| $R_0$<br>at the<br>hyperparametric<br>level | Number of<br>fade-outs<br>out of 15<br>outbreaks | Median increase in ROPE percentage<br>(from independent to hierarchical<br>estimation) |               |                  |
|---------------------------------------------|--------------------------------------------------|----------------------------------------------------------------------------------------|---------------|------------------|
|                                             |                                                  | Fade-outs                                                                              | Non fade-outs | Overall increase |
| 1.5                                         | 9                                                | 21                                                                                     | 38            | 29               |
| 2.5                                         | 7                                                | 36                                                                                     | 20            | 34               |
| 4                                           | 7                                                | 21                                                                                     | 8.5           | 27               |
| 8                                           | 8                                                | 35                                                                                     | 20            | 34               |

#### 212 4.2 Parameter estimates under incomplete time-series data

213 We draw the reader’s attention to the disease dynamics of sub-population 6 of our first dataset ( $R_0 = 2.5$   
 214 at the hyper-parametric level, Figure 2). This outbreak had not experienced an epidemic fade-out in 35 days  
 215 (as the prevalence had not reached zero), nor had it displayed a distinct second wave. This was reflected in  
 216 the posterior distribution of the waning immunity when estimated under the independent (non-hierarchical)  
 217 framework, whereby the shape of the distribution was positively skewed and strongly biased towards  $\mu = 0$   
 218 (Figure 3). That is, *SIR*-like dynamics were not excluded. This observation motivated us to study whether  
 219 a hierarchical framework, already informed by observed dynamics from other outbreaks, is able to identify  
 220 the presence of waning immunity within a sub-population when only a part of the time-series (for that  
 221 sub-population) is observed.

222 Accordingly, we drew two additional parameter sets from the same probability distributions that were  
 223 used to generate the synthetic data for the 15 existing sub-populations. For each of these parameter sets  
 224 we generated a new outbreak (henceforth labelled sub-populations 16 and 17). The sampled transmission  
 225 rates for the two sub-populations were 2.6355 and 2.0364, the recovery rates were 1.0169 and 0.9352, and the  
 226 waning immunity rates were 0.0642 and 0.0443 respectively. We first generated sample paths up to 35 days,  
 227 ensuring that one of the sub-populations displayed a second wave and the other, an epidemic fade-out. We  
 228 then produced an incomplete time-series data set for each sub-population by taking only the first 15 days of  
 229 data. Plot (A) of Figure 6 displays the observed incomplete time-series (black solid line) and the complete  
 230 time-series (black dashed line).

231 Under our scenario, an investigation of the first 15 sub-populations has already been conducted, from  
 232 which clear evidence for waning immunity has been established, so parameter estimation for the two new  
 233 sub-populations was conducted assuming a prior that excludes  $\mu = 0$  (that is, assumption 2 in preceding  
 234 analyses). We first estimated the parameters by considering the outbreaks independently and then conducted  
 235 inference under a hierarchical framework. We carried out the latter analyses by considering data from all 17  
 236 outbreaks; that is, 15 existing sub-populations with 35-day time-series data and 2 new sub-populations with  
 237 15-day time-series data.

238 Plots (B) and (C) of Figure 6 illustrate the posterior distributions under the two estimation frameworks for  
239 the two new outbreaks with partial data for  $\mu$  and  $\beta$  respectively. Furthermore, for comparison, we have also  
240 plotted the posterior distributions under the hierarchical framework if complete data for all 17 populations  
241 were available. The parameter estimates for both sub-populations under the hierarchical analysis improved  
242 in comparison to those from the independent analysis, with a notable improvement in the estimate for the  
243 waning immunity rate for sub-population 17 where the strong bias towards  $\mu = 0$  present in the independent  
244 analysis was removed. Marginal posterior densities under the hierarchical framework with incomplete data  
245 showed only minor differences to those with complete data.

246 Using the methods of Ballard et al. (2016), we also calculated the epidemic fade-out probabilities, 0.3003  
247 and 0.7199, given the true parameters for sub-populations 16 and 17 respectively. Plot (D) of Figure 6  
248 illustrates the estimated distributions of the probability of epidemic fade-out for the two sub-populations  
249 when partial (up-to 15 days) and complete (up-to 35 days) time-series data are considered (see Supplementary  
250 Material S2.8 for details). However, neither technique (independent nor hierarchical) gave a reasonable  
251 estimate for the fade-out probability.

252 These additional analyses demonstrate that a hierarchical approach may support real-time analyses (where  
253 a ‘new’ outbreak is active in a new sub-population) as well as retrospective epidemiological analyses, although  
254 estimates for epidemiological parameters are likely more reliable than estimates for quantities such as the  
255 probability of epidemic fade-out.

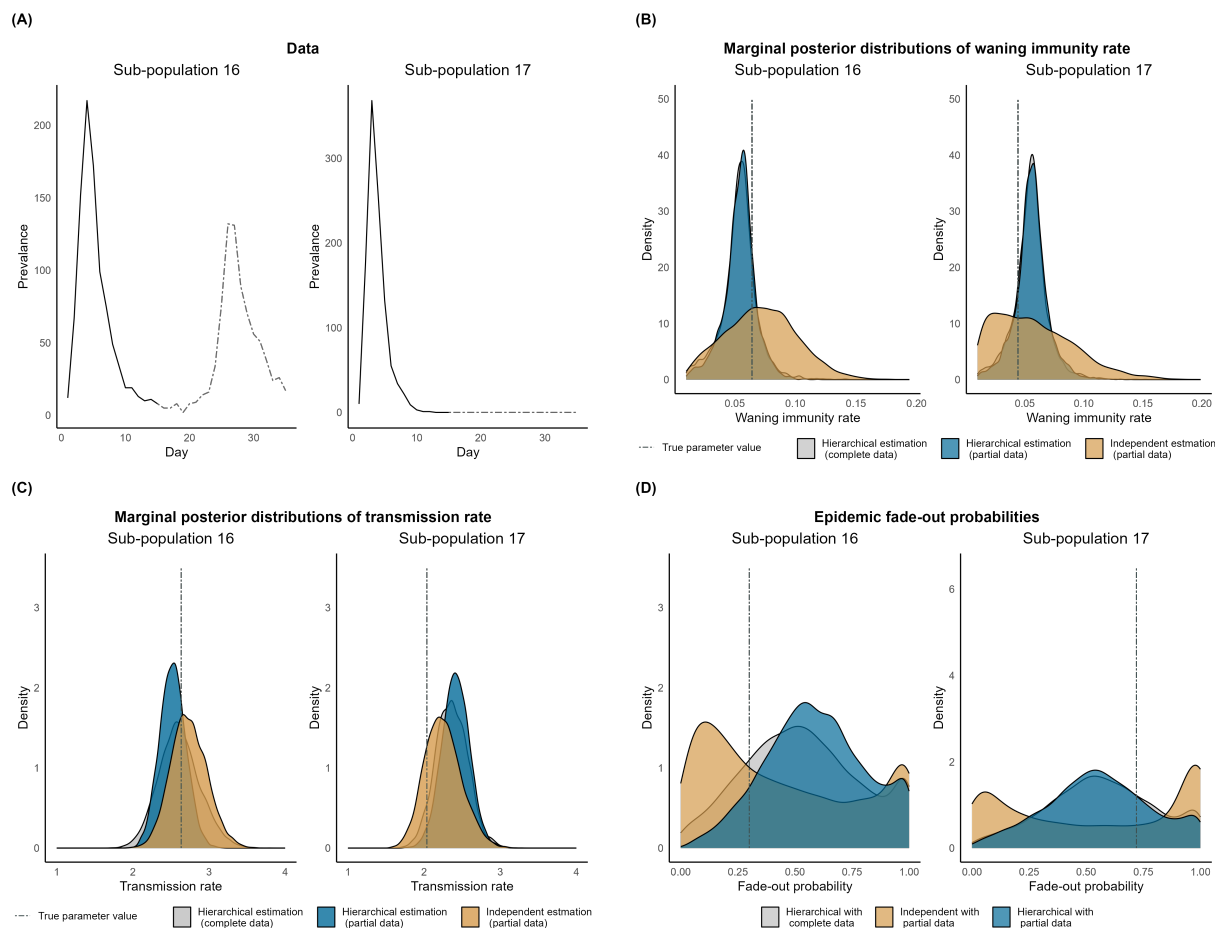

Figure 6: **Plot (A):** Data observed (in black line) and not yet observed (in grey dashed) for sub-populations 16 and 17.

**Plot (B):** Posterior distributions for  $\mu$  for the sub-populations 16 and 17 under parameter estimation independently and under a hierarchical framework.

**Plot (C):** Posterior distributions for  $\beta$  for the sub-populations 16 and 17 under parameter estimation independently and under a hierarchical framework.

**Plot (D) :** Probability of epidemic fade-out distributions from the estimated parameters. The horizontal line represents the probability fade-out calculated with the true parameter values using the methods by Ballard et al. (2016).

## 256 5 Discussion

257 We have studied a hypothetical infectious disease that has a non-zero waning immunity rate. We have  
 258 shown that when multiple outbreaks take place in multiple communities, parameter estimates can be expected  
 259 to improve when estimation is carried out under a hierarchical framework in comparison to when the outbreaks  
 260 are studied independently. Application of the parameter estimation framework introduced by Alahakoon et  
 261 al. (2022) yielded improved estimates.

262 Epidemic fade-out is a combined result of characteristics of the sub-populations and stochastic effects at  
 263 low prevalence levels. Therefore, it is possible to observe epidemic fade-out or multiple waves in different  
 264 sub-populations. We have shown that when an epidemic fade-out is observed in a sub-population where  
 265 multiple waves are possible, the parameter(s) that indicate the possibility of re-infection/ multiple waves can  
 266 be incorrectly estimated when the outbreak is studied independently. On the other hand, when a hierarchical  
 267 framework is used to study multiple outbreaks, information is shared among all the sub-populations which

268 aids in improving the estimates for re-infection (and other model parameters) even when an epidemic fade-out  
269 is observed.

270 Furthermore, we have shown that even when there is incomplete data for some sub-populations, the waning  
271 immunity rate can be estimated when a hierarchical framework is used.

272 Another possible application occurs within surveillance frameworks where data accumulation is expected.  
273 As an example, when only some of the first few outbreaks of an emerging infection display epidemic fade-out,  
274 using a hierarchical framework can aid in identifying the rate of waning immunity among those communities  
275 that observed fade-outs.

276 Conditional on their parameter values, we have assumed that the outbreaks evolve independently. An  
277 example of such a setting includes the outbreaks that occurred on board Australian ships during the influenza  
278 pandemic of 1918 (Alahakoon et al., 2023; Cumpston, 1919).

279 This work and that of Alahakoon et al. (2022) considered using hierarchical frameworks within an *SIRS*  
280 model structure. Here, we have extended the framework of Alahakoon et al. (2022) to estimate multiple  
281 parameters. We believe that this demonstration of the statistical validity of our inference method and its  
282 applicability to a foundational model in mathematical epidemiology (*SIRS* dynamics) provides a robust  
283 platform for the method to be applied to actual data. We are now applying our estimation framework to  
284 such data, including an analysis of outbreaks of pandemic influenza aboard troop ships returning to Australia  
285 in 1918 (Alahakoon et al., 2023).

286 The estimation framework is applicable for any process that can be described using a compartmental  
287 stochastic model, including those in infectious disease epidemiology and other areas such as within-host  
288 dynamics. For example, in clinical trial settings where pharmaco-kinetic pharmaco-dynamic models are used  
289 routinely (Cao et al., 2019; Sun, McCaw, & Cao, 2022) in combination with Bayesian hierarchical methods,  
290 there is clear evidence that stochastic effects are present and multi-wave behaviour (e.g., recrudescence of  
291 malaria within the host), as well as extinction, may be observed.

## 292 **6 Acknowledgements**

293 Unless otherwise mentioned, computations were done in MATLAB or R across 32 clusters. All the computations  
294 were carried out by the use of the Nectar Research Cloud (project Infectious Diseases), a collaborative  
295 Australian research platform supported by the National Collaborative Research Infrastructure Strategy  
296 (NCRIS). All the plots were generated with ggplot2 (Wickham, 2016) in R. The codes are publicly available  
297 (see Supplementary Material for details).

## 298 **7 Funding**

299 Punya Alahakoon is supported by a Melbourne Research Scholarship from the University of Melbourne. P.G.  
300 Taylor would like to acknowledge the support of the Australian Research Council via the Centre of Excellence  
301 for Mathematical and Statistical Frontiers (ACEMS).

## 302 References

- 303 Alahakoon, P., McCaw, J. M., & Taylor, P. G. (2022). Estimation of the probability of epidemic fade-out  
304 from multiple outbreak data. *Epidemics*, 100539.
- 305 Alahakoon, P., Taylor, P. G., & McCaw, J. M. (2023). How effective was maritime quarantine in australia  
306 during the influenza pandemic of 1918-19? *medRxiv*, 2023–01.
- 307 Anderson, R. M., & May, R. M. (1992). *Infectious diseases of humans: dynamics and control*. Oxford  
308 university press.
- 309 Ballard, P., Bean, N., & Ross, J. (2016). The probability of epidemic fade-out is non-monotonic in transmission  
310 rate for the Markovian SIR model with demography. *Journal of Theoretical Biology*, 393, 170–178.
- 311 Bartlett, M. S. (1960). The critical community size for measles in the United States. *Journal of the Royal  
312 Statistical Society: Series A (General)*, 123(1), 37–44.
- 313 Begon, M., Bennett, M., Bowers, R. G., French, N. P., Hazel, S., & Turner, J. (2002). A clarification  
314 of transmission terms in host-microparasite models: numbers, densities and areas. *Epidemiology &  
315 Infection*, 129(1), 147–153.
- 316 Camacho, A., Ballesteros, S., Graham, A. L., Carrat, F., Ratmann, O., & Cazelles, B. (2011). Explaining  
317 rapid reinfections in multiple-wave influenza outbreaks: Tristan da Cunha 1971 epidemic as a case  
318 study. *Proceedings of the Royal Society B: Biological Sciences*, 278(1725), 3635–3643.
- 319 Camacho, A., & Cazelles, B. (2013). Does homologous reinfection drive multiple-wave influenza outbreaks?  
320 Accounting for immunodynamics in epidemiological models. *Epidemics*, 5(4), 187–196.
- 321 Cao, P., Collins, K. A., Zaloumis, S., Wattanakul, T., Tarning, J., Simpson, J. A., ... McCaw, J. M. (2019).  
322 Modeling the dynamics of plasmodium falciparum gametocytes in humans during malaria infection.  
323 *Elife*, 8, e49058.
- 324 Chen, M.-H., Shao, Q.-M., & Ibrahim, J. G. (2012). *Monte Carlo methods in Bayesian computation*. Springer  
325 Science & Business Media.
- 326 Coly, S., Garrido, M., Abrial, D., & Yao, A.-F. (2021). Bayesian hierarchical models for disease mapping  
327 applied to contagious pathologies. *PloS One*, 16(1), e0222898.
- 328 Cumpston, J. H. L. (1919). *Influenza and maritime quarantine in australia* (No. 18). Issued under the  
329 Authority of the Minister for Trade and Customs, AJ Mullett ...
- 330 Doob, J. L. (1945). Markoff chains—denumerable case. *Transactions of the American Mathematical Society*,  
331 58(3), 455–473.
- 332 Gelman, A., Carlin, J. B., Stern, H. S., Dunson, D. B., Vehtari, A., & Rubin, D. B. (2013). *Bayesian data  
333 analysis*. CRC press.
- 334 Gillespie, D. T. (1977). Exact stochastic simulation of coupled chemical reactions. *The journal of physical  
335 chemistry*, 81(25), 2340–2361.
- 336 Heffernan, J., & Keeling, M. (2009). Implications of vaccination and waning immunity. *Proceedings of the  
337 Royal Society B: Biological Sciences*, 276(1664), 2071–2080.
- 338 Keeling, M., & Rohani, P. (2011). *Modeling Infectious Diseases in Humans and Animals*. Princeton University  
339 Press. Retrieved from <https://books.google.com.au/books?id=LxzILSuKdHUC>
- 340 Kermack, W. O., & McKendrick, A. G. (1927). A contribution to the mathematical theory of epidemics.  
341 *Proceedings of the royal society of london. Series A, Containing papers of a mathematical and physical  
342 character*, 115(772), 700–721.
- 343 Kruschke, J. (2014). *Doing Bayesian data analysis: A tutorial with r, jags, and stan*. Academic Press.
- 344 Kruschke, J. K. (2013). Bayesian estimation supersedes the t test. *Journal of Experimental Psychology:  
345 General*, 142(2), 573.
- 346 Kruschke, J. K. (2018). Rejecting or accepting parameter values in Bayesian estimation. *Advances in methods  
347 and practices in psychological science*, 1(2), 270–280.
- 348 Lavine, J. S., Bjornstad, O. N., & Antia, R. (2021). Immunological characteristics govern the transition of  
349 COVID-19 to endemicity. *Science*, 371(6530), 741–745.
- 350 Lawson, A. B., & Song, H.-R. (2010). Bayesian hierarchical modeling of the dynamics of spatio-temporal  
351 influenza season outbreaks. *Spatial and spatio-temporal epidemiology*, 1(2-3), 187–195.
- 352 Lloyd, A. L. (2004). Estimating variability in models for recurrent epidemics: assessing the use of moment  
353 closure techniques. *Theoretical Population Biology*, 65(1), 49–65.
- 354 Lloyd-Smith, J. O., Cross, P. C., Briggs, C. J., Daugherty, M., Getz, W. M., Latto, J., ... Swei, A. (2005).  
355 Should we expect population thresholds for wildlife disease? *Trends in Ecology & Evolution*, 20(9),  
356 511–519.
- 357 Mathews, J. D., McBryde, E. S., McVernon, J., Pallaghy, P. K., & McCaw, J. M. (2010). Prior immunity  
358 helps to explain wave-like behaviour of pandemic influenza in 1918-9. *BMC infectious diseases*, 10(1),  
359 1–9.

- 360 Mathews, J. D., McCaw, C. T., McVernon, J., McBryde, E. S., & McCaw, J. M. (2007). A biological model  
361 for influenza transmission: pandemic planning implications of asymptomatic infection and immunity.  
362 *PLoS One*, *2*(11), e1220.
- 363 McCallum, H., Barlow, N., & Hone, J. (2001). How should pathogen transmission be modelled? *Trends in*  
364 *ecology & evolution*, *16*(6), 295–300.
- 365 Meerson, B., & Sasorov, P. V. (2009). WKB theory of epidemic fade-out in stochastic populations. *Physical*  
366 *Review E*, *80*(4), 041130.
- 367 Meredith, M., & Kruschke, J. (2020). HDInterval: Highest (Posterior) Density Intervals [Computer software  
368 manual]. Retrieved from <https://CRAN.R-project.org/package=HDInterval> (R package version  
369 0.2.2)
- 370 Mooi, F. R., Van Der Maas, N. A., & De Melker, H. E. (2014). Pertussis resurgence: waning immunity and  
371 pathogen adaptation—two sides of the same coin. *Epidemiology & Infection*, *142*(4), 685–694.
- 372 Sun, X., McCaw, J. M., & Cao, P. (2022). Stochastic modeling of within-host dynamics of plasmodium  
373 falciparum. *Mathematics*, *10*(21), 4057.
- 374 Telenti, A., Arvin, A., Corey, L., Corti, D., Diamond, M. S., García-Sastre, A., . . . Virgin, H. W. (2021).  
375 After the pandemic: perspectives on the future trajectory of COVID-19. *Nature*, *596*(7873), 495–504.
- 376 Toni, T., Welch, D., Strelkowa, N., Ipsen, A., & Stumpf, M. P. (2009). Approximate Bayesian computation  
377 scheme for parameter inference and model selection in dynamical systems. *Journal of the Royal Society*  
378 *Interface*, *6*(31), 187–202.
- 379 van Herwaarden, O. A. (1997). Stochastic epidemics: the probability of extinction of an infectious disease at  
380 the end of a major outbreak. *Journal of Mathematical Biology*, *35*(7), 793–813.
- 381 Wickham, H. (2016). *ggplot2: Elegant graphics for data analysis*. Springer-Verlag New York. Retrieved from  
382 <https://ggplot2.tidyverse.org>
